# Supplementary material for: Estrogen receptor beta reduces colon cancer metastasis through a novel miR-205 - PROX1 mechanism
Source: PubMed Central journal article supplement (PMC5173124; doi:10.18632/oncotarget.9895), 2016-06-07
Supplement: oncotarget-07-42159-s001.pdf [file oncotarget-07-42159-s001.pdf]

## Estrogen receptor beta reduces colon cancer metastasis through a novel miR-205 - PROX1 mechanism

### Supplementary Materials

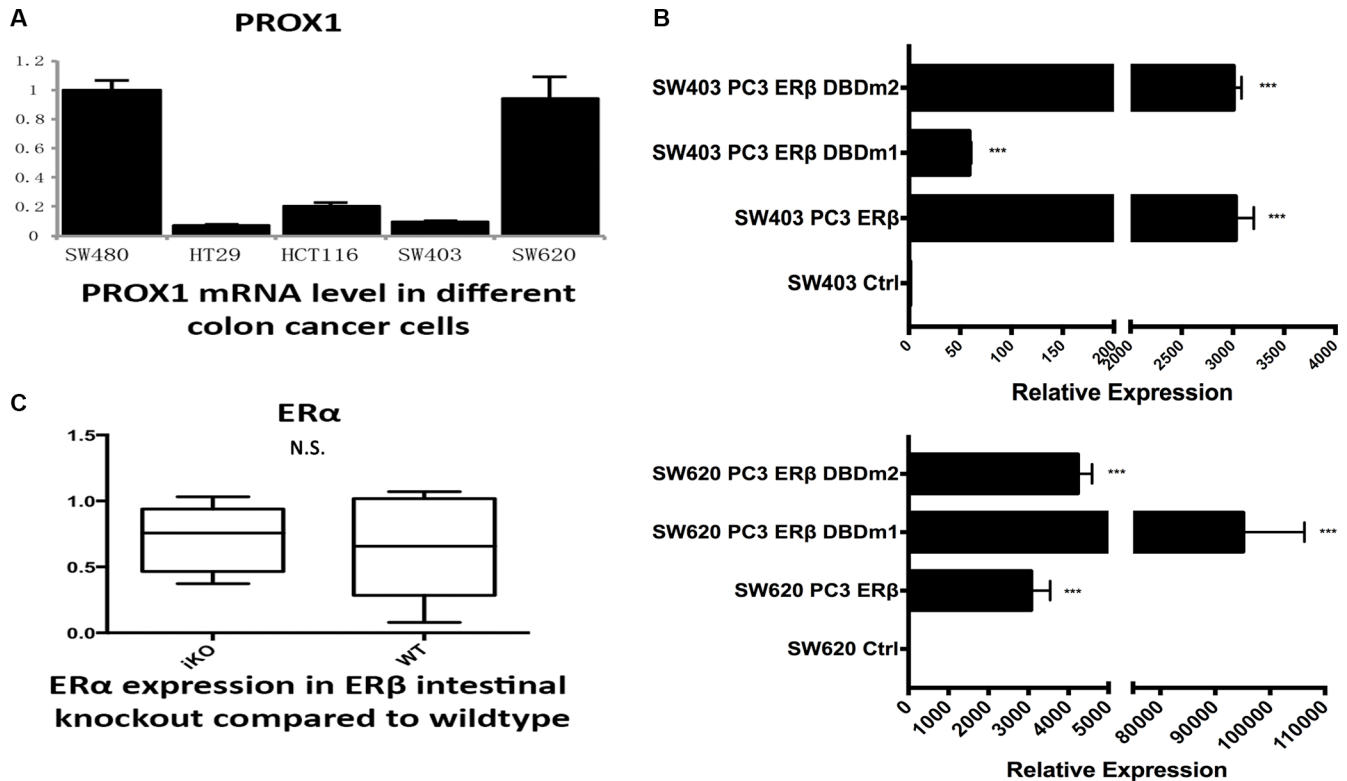

**Supplementary Figure S1: mRNA levels measured by qPCR.** (A) PROX1 in different colorectal cancer cell lines. The inverse correlation between miR-205 and PROX1 mRNA levels ( $r = -0.44$ ) were not significant ( $p = 0.09$ ). (B) Expression of transiently transfected ERβ and ERβ-DBD mutant corroborated in SW403 and SW620 cell lines. ( $*P < 0.05$ ,  $**P < 0.01$ , Student's  $t$ -test). C. Expression of ERα in colon epithelial scrape from intestine-specific ERβ knockout mice (iKO) and corresponding controls (WT) is not changed.

#### Mir205 TargetScan

Human PROX1 ENST00000366958.4 3' UTR length: 5670

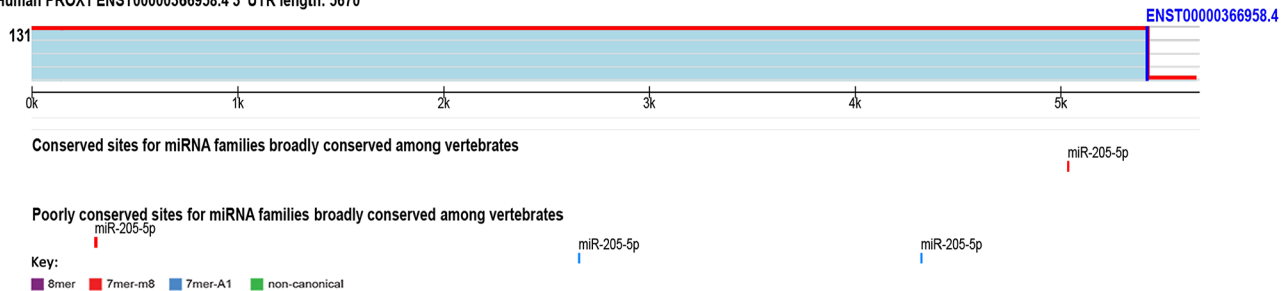

**Supplementary Figure S2: Predicted miR-205 sites of PROX1 3'UTR using Targetscan.** In this study we demonstrate that the site at position 291-313 nt 3' of the coding sequence (to the left in figure) *de facto* interacts with miR-205.

**Supplementary Table S1: Correlation between ER $\beta$ , Prox1, and miR-205 in ER $\beta$ <sup>ikO</sup> mouse colon tissue**

|            | <b>PROX1</b>          | <b>miR-205</b>        |
|------------|-----------------------|-----------------------|
| ER $\beta$ | -0.38 ( $p = 0.037$ ) | 0.51 ( $p = 0.028$ )  |
| PROX1      |                       | -0.05 ( $p = 0.048$ ) |

Expression of ER $\beta$  is correlated to miR-205 expression, while inversely correlated to *Prox1* expression. Correlations were analyzed using Pearson correlation, and considered significant if  $p < 0.05$ .
